# Supplementary material
Source: PubMed Central journal article supplement (PMC10414231)
Supplement: xmed_v2i2e27254_app1.pdf [file xmed_v2i2e27254_app1.pdf]

**Table S1: Characteristics of Included Studies**

| Study                | Design/setting                                                             | Sample                                                         | Strategies                                                                                                                  | Assumptions                                                                                                                                                                                                                                                                                                                                                                                                                                                                                                                                                                                                                 | Main findings                                                                                                                                                    |
|----------------------|----------------------------------------------------------------------------|----------------------------------------------------------------|-----------------------------------------------------------------------------------------------------------------------------|-----------------------------------------------------------------------------------------------------------------------------------------------------------------------------------------------------------------------------------------------------------------------------------------------------------------------------------------------------------------------------------------------------------------------------------------------------------------------------------------------------------------------------------------------------------------------------------------------------------------------------|------------------------------------------------------------------------------------------------------------------------------------------------------------------|
| <b>Effectiveness</b> |                                                                            |                                                                |                                                                                                                             |                                                                                                                                                                                                                                                                                                                                                                                                                                                                                                                                                                                                                             |                                                                                                                                                                  |
| Emery et al [44]     | <ul style="list-style-type: none"> <li>Modeling study in Japan</li> </ul>  | <ul style="list-style-type: none"> <li>3711</li> </ul>         | <ul style="list-style-type: none"> <li>Symptom-based testing</li> <li>Symptom-agnostic testing</li> </ul>                   | <ul style="list-style-type: none"> <li>Constant infectiousness</li> <li>Progress to presymptomatic/asymptomatic is irrespective of the origin of infections.</li> <li>Unavailable symptom onset date for 115 cases proportional to cases with reported dates</li> <li>Unavailable test dates for 13 persons proportionate to tests among those with unreported symptom onset.</li> <li>Proportion of asymptomatic infectiousness</li> <li>Individual test negative after the infectious period</li> <li>Test accuracy = 100%</li> <li>People are 50% more likely to be tested in biased symptom-agnostic testing</li> </ul> | <ul style="list-style-type: none"> <li>Testing irrespective of symptoms showed to be more effective in case identification than symptom-based testing</li> </ul> |
| Grassly et al [45]   | <ul style="list-style-type: none"> <li>Modeling study in the UK</li> </ul> | <ul style="list-style-type: none"> <li>Hypothetical</li> </ul> | <ul style="list-style-type: none"> <li>Symptom-based self-isolation</li> <li>Symptom testing and case isolation.</li> </ul> | <ul style="list-style-type: none"> <li>Asymptomatic individuals are less infectious than symptomatic individuals.</li> <li>100% Polymerase chain</li> </ul>                                                                                                                                                                                                                                                                                                                                                                                                                                                                 | <ul style="list-style-type: none"> <li>Self-isolation upon symptom onset will reduce transmissions by 47% (95% Uncertainty)</li> </ul>                           |

| Study           | Design/<br>setting                                                         | Sample                                                | Strategies                                                                                                                                                                                                                                                                   | Assumptions                                                                                                                                                                                                                                                                                                                                                                                                                                          | Main findings                                                                                                                                                                                                                                                                                                                                                           |
|-----------------|----------------------------------------------------------------------------|-------------------------------------------------------|------------------------------------------------------------------------------------------------------------------------------------------------------------------------------------------------------------------------------------------------------------------------------|------------------------------------------------------------------------------------------------------------------------------------------------------------------------------------------------------------------------------------------------------------------------------------------------------------------------------------------------------------------------------------------------------------------------------------------------------|-------------------------------------------------------------------------------------------------------------------------------------------------------------------------------------------------------------------------------------------------------------------------------------------------------------------------------------------------------------------------|
|                 |                                                                            |                                                       | <ul style="list-style-type: none"> <li>Regular testing of high-risk groups irrespective of symptoms &amp; isolation</li> <li>Test and trace of contacts &amp; isolation</li> <li>Contact tracing by symptoms alone.</li> <li>Test-trace-test contacts and isolate</li> </ul> | <ul style="list-style-type: none"> <li>reaction (PCR) test sensitivity</li> <li>100% coverage of Test and Trace</li> <li>Sample collection is done at symptom onset.</li> <li>1 day delay from sample collection and quarantining of contacts.</li> <li>80% of symptomatic cases are reported.</li> <li>80% of symptomatic contacts are traced.</li> <li>Testing is done on the day of symptom onset</li> </ul>                                      | <ul style="list-style-type: none"> <li>Interval, UI: 32-55).</li> <li>Screening all healthcare workers and other high at-risk populations every week will further reduce transmission by 23% (95% Uncertainty Interval: UI 16–40) in addition to that achieved by isolation.</li> <li>Test and trace will further reduce transmissions by 26% (95% UI:14-35)</li> </ul> |
| Tsou et al [46] | <ul style="list-style-type: none"> <li>Modeling study in Taiwan</li> </ul> | <ul style="list-style-type: none"> <li>393</li> </ul> | <ul style="list-style-type: none"> <li>Symptom-based testing and isolation of index cases</li> <li>Mass testing of symptomatic and asymptomatic subclinical cases</li> <li>Symptom-based testing, isolation, and quarantine of all at-risk group</li> </ul>                  | <ul style="list-style-type: none"> <li>Incubation period per case and symptom onset to isolation delay, follow a Weibull distribution.</li> <li>Potential secondary cases follow a negative binomial distribution with mean = reproduction number R</li> <li>Strategies differed in their control of subclinical cases.</li> <li>Initial number of cases = 5, 20 &amp; 40</li> <li>At-risk persons investigated = 40%, 60%, 80% &amp; 90%</li> </ul> | <ul style="list-style-type: none"> <li>The strategy of symptom-based testing, isolation, and quarantining all subclinical cases was most effective.</li> <li>Strategy B was better than A in the prevention of transmissions before symptom onset</li> </ul>                                                                                                            |

| Study                | Design/<br>setting                                                              | Sample                                                                   | Strategies                                                                                                                                                                                                                                                                                                                                  | Assumptions                                                                                                                                                                                                                                                                            | Main findings                                                                                                                                                                                                                                                                                                                         |
|----------------------|---------------------------------------------------------------------------------|--------------------------------------------------------------------------|---------------------------------------------------------------------------------------------------------------------------------------------------------------------------------------------------------------------------------------------------------------------------------------------------------------------------------------------|----------------------------------------------------------------------------------------------------------------------------------------------------------------------------------------------------------------------------------------------------------------------------------------|---------------------------------------------------------------------------------------------------------------------------------------------------------------------------------------------------------------------------------------------------------------------------------------------------------------------------------------|
|                      |                                                                                 |                                                                          |                                                                                                                                                                                                                                                                                                                                             | <ul style="list-style-type: none"> <li>• 40%, 60%, 80% of subclinical cases assumed to be detected and isolated.</li> <li>• Subclinical cases can completely be prevented</li> </ul>                                                                                                   |                                                                                                                                                                                                                                                                                                                                       |
| Mizumoto et al [47]  | <ul style="list-style-type: none"> <li>• Modeling study in Japan</li> </ul>     | <ul style="list-style-type: none"> <li>• 3063</li> </ul>                 | <ul style="list-style-type: none"> <li>• Mass testing</li> </ul>                                                                                                                                                                                                                                                                            | N/A                                                                                                                                                                                                                                                                                    | <ul style="list-style-type: none"> <li>• A total of 634 cases were detected 328 of whom were asymptomatic.</li> <li>• The proportion of asymptomatic increased over the weeks</li> </ul>                                                                                                                                              |
| Sasmita et al [48]   | <ul style="list-style-type: none"> <li>• Modeling study in Indonesia</li> </ul> | <ul style="list-style-type: none"> <li>• Daily Covid-19 cases</li> </ul> | <ul style="list-style-type: none"> <li>• Scenario 1 = <math>u1+u4+u5</math></li> <li>• Scenario 2 = <math>u1+u2+u4+u5</math></li> <li>• Scenario 3 = <math>u1+u2+u3+u4+u5</math></li> <li>• U1 = Large-scale social restriction; U2 = Contact tracing; U3 = Mass testing; U4 = Case detection and treatment; U5 = Face masks use</li> </ul> | <ul style="list-style-type: none"> <li>• 95% false positive rate from susceptible to exposed.</li> <li>• Possibility of reinfections due to loss of immunity</li> <li>• All parameters were assumed to be positive and constant.</li> <li>• Availability of rapid PCR tests</li> </ul> | <ul style="list-style-type: none"> <li>• COVID-19 cases attained peak for strategy 1, 2, and 3 on 59<sup>th</sup>, 38<sup>th</sup>, and 40<sup>th</sup> day after initial outbreak with 33151, 37908, and 39305 cases, respectively.</li> <li>• The optimal control measure was scenario 2 with (u1), (u2), (u4), and (u5)</li> </ul> |
| Moghadass et al [49] | <ul style="list-style-type: none"> <li>• Modeling study in Canada</li> </ul>    | <ul style="list-style-type: none"> <li>• Hypothetical</li> </ul>         | <ul style="list-style-type: none"> <li>• No self-isolation</li> <li>• 100% severe cases self-isolate</li> <li>• 100% symptomatic</li> </ul>                                                                                                                                                                                                 | <ul style="list-style-type: none"> <li>• The Proportion of asymptomatic infections is 17.9% and 30.8%</li> </ul>                                                                                                                                                                       | <ul style="list-style-type: none"> <li>• Isolating all symptomatic will still be inefficient in outbreak control.</li> <li>• Combined with case</li> </ul>                                                                                                                                                                            |

| Study               | Design/<br>setting                                                          | Sample                                                                 | Strategies                                                                                                                                                                                                                             | Assumptions                                                                                                                                                                                                                                                                                                                                                                                                            | Main findings                                                                                                                                                                                                                            |
|---------------------|-----------------------------------------------------------------------------|------------------------------------------------------------------------|----------------------------------------------------------------------------------------------------------------------------------------------------------------------------------------------------------------------------------------|------------------------------------------------------------------------------------------------------------------------------------------------------------------------------------------------------------------------------------------------------------------------------------------------------------------------------------------------------------------------------------------------------------------------|------------------------------------------------------------------------------------------------------------------------------------------------------------------------------------------------------------------------------------------|
|                     |                                                                             |                                                                        | <ul style="list-style-type: none"> <li>case self-isolate</li> <li>100% isolation of symptomatic cases plus detection and isolation of asymptomatic cases</li> </ul>                                                                    |                                                                                                                                                                                                                                                                                                                                                                                                                        | isolation, results indicated that 33% and 42% detection and isolation of silent infections would be needed to suppress the attack rate below 1%, for asymptomatic proportions of 17.9% and 30.8%, respectively                           |
| Bracis et al [50]   | <ul style="list-style-type: none"> <li>Modeling study in the USA</li> </ul> | <ul style="list-style-type: none"> <li>Daily Covid-19 cases</li> </ul> | <ul style="list-style-type: none"> <li>No intervention</li> <li>Isolating the elderly</li> <li>Schools opening in fall.</li> <li>Testing, treatment, isolation, and contact tracing in combination with physical distancing</li> </ul> | <ul style="list-style-type: none"> <li>20% of infections are symptomatic.</li> <li>Homogenous infectivity and outcome</li> <li>Constant diagnostic rate</li> <li>More than 40% diagnosed during early testing.</li> <li>50% of contacts are successfully traced.</li> <li>Contact tracing permits 5% of asymptomatic and subclinical to be tested.</li> <li>Differential post-COVID-19 physical interaction</li> </ul> | <ul style="list-style-type: none"> <li>Ramping up testing, isolation, and contact tracing of symptomatic cases reduced post-COVID interactions by 60% and very few deaths.</li> <li>Mass testing was not found to be feasible</li> </ul> |
| Pollmann et al [51] | <ul style="list-style-type: none"> <li>Modeling study</li> </ul>            | <ul style="list-style-type: none"> <li>Hypothetical</li> </ul>         | <ul style="list-style-type: none"> <li>Digital contact tracing (based on reported symptoms),</li> <li>Quarantining,</li> </ul>                                                                                                         | <ul style="list-style-type: none"> <li>All contacts using digital contact tracing can be traced.</li> <li>Unreported symptoms and untested symptomatic cases</li> <li>Tracing of infected contacts</li> </ul>                                                                                                                                                                                                          | <ul style="list-style-type: none"> <li>Contact tracing must be combined with either random mass testing or social distancing to control the epidemic.</li> </ul>                                                                         |

| Study           | Design/<br>setting                                                           | Sample                                                                       | Strategies                                                                                                         | Assumptions                                                                                                                                                                                                                                                                                                                                                                                                                                                                                                                                                                                                                                     | Main findings                                                                                                                                                                                           |
|-----------------|------------------------------------------------------------------------------|------------------------------------------------------------------------------|--------------------------------------------------------------------------------------------------------------------|-------------------------------------------------------------------------------------------------------------------------------------------------------------------------------------------------------------------------------------------------------------------------------------------------------------------------------------------------------------------------------------------------------------------------------------------------------------------------------------------------------------------------------------------------------------------------------------------------------------------------------------------------|---------------------------------------------------------------------------------------------------------------------------------------------------------------------------------------------------------|
|                 |                                                                              |                                                                              | <ul style="list-style-type: none"> <li>• Testing</li> <li>• Social distancing</li> <li>• Random testing</li> </ul> | <ul style="list-style-type: none"> <li>• Immediate quarantine upon the report of symptoms</li> <li>• 100% test accuracy</li> <li>• Homogeneous population</li> <li>• Immunity once recovered.</li> <li>• No symptoms-testing delay</li> <li>• Absence of manual tracing</li> <li>• Fixed latent period.</li> <li>• A backward/forward tracing</li> </ul>                                                                                                                                                                                                                                                                                        | <ul style="list-style-type: none"> <li>• Daily random testing of 20% of the population found to be as effective as social distancing</li> </ul>                                                         |
| Hill et al [52] | <ul style="list-style-type: none"> <li>• Modeling study in the UK</li> </ul> | <ul style="list-style-type: none"> <li>• 2010 social contact data</li> </ul> | <ul style="list-style-type: none"> <li>• Test and trace</li> <li>• Regular mass testing</li> </ul>                 | <ul style="list-style-type: none"> <li>• Each person can be infectious.</li> <li>• Contact network follows the Poisson distribution.</li> <li>• Contact probabilities fall with the level of accommodation.</li> <li>• No random accommodation</li> <li>• People can infect 1-day post symptom onset.</li> <li>• 100% test specificity</li> <li>• Possible to Forget contacts</li> <li>• Self-isolation time=10 days</li> <li>• Test- results delay= 2 days</li> <li>• Contact isolation = 14 days</li> <li>• Adherence to test and trace.</li> <li>• No contacts during isolation</li> <li>• No COVID-19 student beginning the term</li> </ul> | <ul style="list-style-type: none"> <li>• Daily and weekly testing combined with contact tracing adherence reduced the number of infections by more than 50% compared to test and trace alone</li> </ul> |
| Gorji           | <ul style="list-style-type: none"> <li>• Modeli</li> </ul>                   | <ul style="list-style-type: none"> <li>• Hypo</li> </ul>                     | <ul style="list-style-type: none"> <li>• Mass testing</li> </ul>                                                   | <ul style="list-style-type: none"> <li>• 90% infection reduction due to</li> </ul>                                                                                                                                                                                                                                                                                                                                                                                                                                                                                                                                                              | <ul style="list-style-type: none"> <li>• Testing high-risk</li> </ul>                                                                                                                                   |

| Study             | Design/setting                                                                  | Sample                                                                                             | Strategies                                                                                                                                                                         | Assumptions                                                                                                                                                                                                                                                                                                                                                         | Main findings                                                                                                                                                                                                                                                                                                                                          |
|-------------------|---------------------------------------------------------------------------------|----------------------------------------------------------------------------------------------------|------------------------------------------------------------------------------------------------------------------------------------------------------------------------------------|---------------------------------------------------------------------------------------------------------------------------------------------------------------------------------------------------------------------------------------------------------------------------------------------------------------------------------------------------------------------|--------------------------------------------------------------------------------------------------------------------------------------------------------------------------------------------------------------------------------------------------------------------------------------------------------------------------------------------------------|
| et al [53]        | ng study in Switzerland                                                         | thetic al                                                                                          | <ul style="list-style-type: none"> <li>• Contact tracing.</li> <li>• Smart testing<sup>a</sup> and contact tracing</li> </ul>                                                      | <ul style="list-style-type: none"> <li>• self-isolation</li> <li>• Basic reproduction number of 2.4 if no mitigation</li> <li>• Test results take 1 day.</li> <li>• Children under 10 contribute little to infections.</li> <li>• The at-risk subpopulation has a 27-fold prevalence rate.</li> <li>• Detection of high contact individuals every 7 days</li> </ul> | <ul style="list-style-type: none"> <li>• individuals irrespective of symptoms with contact tracing will reduce R to 1.</li> <li>• Contact tracing based on symptom testing will miss most cases.</li> </ul>                                                                                                                                            |
| Alsing et al [54] | <ul style="list-style-type: none"> <li>• Modeli ng study in the UK</li> </ul>   | <ul style="list-style-type: none"> <li>• 2011 com puter data and BBC pande mic datas et</li> </ul> | <ul style="list-style-type: none"> <li>• Contact tracing and social distancing.</li> <li>• Contact tracing with Mass testing.</li> <li>• Contact tracing with lockdowns</li> </ul> | <ul style="list-style-type: none"> <li>• Active infections at 8 months</li> <li>• The number of daily tests required.</li> <li>• Effective reproduction number (RE) per scenario</li> <li>• Number of people in lockdown</li> </ul>                                                                                                                                 | <ul style="list-style-type: none"> <li>• Possible to control 38% of outbreak simulations within 8 months using contact tracing with 63.3% of outbreak still leaving <math>R &gt; 1</math>.</li> <li>• Mass testing and contact tracing contained 74% of the outbreak simulations with 36.8% of outbreaks resulting in <math>R &lt; 1</math></li> </ul> |
| Hagan et al [55]  | <ul style="list-style-type: none"> <li>• Cross section al in the USA</li> </ul> | <ul style="list-style-type: none"> <li>• 1616 1</li> </ul>                                         | <ul style="list-style-type: none"> <li>• Symptom-based testing</li> <li>• Mass testing</li> </ul>                                                                                  | N/A                                                                                                                                                                                                                                                                                                                                                                 | <ul style="list-style-type: none"> <li>• Mass testing increased the number of COVID-19 cases from 642 (range = 2–181, median = 19) after symptom-based testing to 8,239 (range = 10–2,193, median = 403) giving a</li> </ul>                                                                                                                           |

| Study                             | Design/<br>setting                                                          | Sample                                                                     | Strategies                                                                                                                                                                                                                                                                                                                                                                               | Assumptions                                                                                                                                                                                                                                                                                                                                                                                                                                                                                                                                                                                                                                                  | Main findings                                                                                                                                                                                                                                                                                                                                                                                                       |
|-----------------------------------|-----------------------------------------------------------------------------|----------------------------------------------------------------------------|------------------------------------------------------------------------------------------------------------------------------------------------------------------------------------------------------------------------------------------------------------------------------------------------------------------------------------------------------------------------------------------|--------------------------------------------------------------------------------------------------------------------------------------------------------------------------------------------------------------------------------------------------------------------------------------------------------------------------------------------------------------------------------------------------------------------------------------------------------------------------------------------------------------------------------------------------------------------------------------------------------------------------------------------------------------|---------------------------------------------------------------------------------------------------------------------------------------------------------------------------------------------------------------------------------------------------------------------------------------------------------------------------------------------------------------------------------------------------------------------|
|                                   |                                                                             |                                                                            |                                                                                                                                                                                                                                                                                                                                                                                          |                                                                                                                                                                                                                                                                                                                                                                                                                                                                                                                                                                                                                                                              | median increase of 12.3-fold                                                                                                                                                                                                                                                                                                                                                                                        |
| <b>Cost-Effectiveness (model)</b> |                                                                             |                                                                            |                                                                                                                                                                                                                                                                                                                                                                                          |                                                                                                                                                                                                                                                                                                                                                                                                                                                                                                                                                                                                                                                              |                                                                                                                                                                                                                                                                                                                                                                                                                     |
| Paltiel et al [56]                | <ul style="list-style-type: none"> <li>Modeling study in the USA</li> </ul> | <ul style="list-style-type: none"> <li>4990 hypothetical cohort</li> </ul> | <ul style="list-style-type: none"> <li>Base case scenario with a reproduction number (Rt) of 2.5, test specificity of 98%, and 10 new infections each week</li> <li>Worst case scenario with an Rt of 3.5, test specificity of 98%, and 25 new infections every week</li> <li>Best case scenario with an Rt of 1.5, test specificity of 99.7%, and 5 new infections each week</li> </ul> | <ul style="list-style-type: none"> <li>Test frequency = 1, 2, 3 &amp; 7</li> <li>Test sensitivity = 70% - 99%</li> <li>Importation of infections via exogenous shocks</li> <li>Specificity of 98% - 99%</li> <li>Reproduction number = 1.5, 2.5 and 3.5</li> <li>Case fatality = 0.05%</li> <li>30% chance that infection will lead to virus symptoms.</li> <li>Cost per test = \$10 - \$50</li> <li>Abbreviated 80-days period.</li> <li>A cohort of non-immune students in a congregate setting of 5,000 students</li> <li>8-hour test turnaround time</li> <li>Availability of 100% confirmatory tests at \$100</li> <li>25 new cases per week</li> </ul> | <ul style="list-style-type: none"> <li>A willingness-to-pay of <math>\leq</math>\$5,500/infection averted, screening every week using a 70% sensitive test was optimal.</li> <li>Regular screening (7, 3 &amp; 2 days) was optimal if only a single test of \$25 with 80% sensitivity was available.</li> <li>There was no condition under which symptom-based screening alone will contain the outbreak</li> </ul> |
| <b>Asymptomatic proportion</b>    |                                                                             |                                                                            |                                                                                                                                                                                                                                                                                                                                                                                          |                                                                                                                                                                                                                                                                                                                                                                                                                                                                                                                                                                                                                                                              |                                                                                                                                                                                                                                                                                                                                                                                                                     |
| Porru et al [57]                  | <ul style="list-style-type: none"> <li>Cohort study in Italy</li> </ul>     | <ul style="list-style-type: none"> <li>5942</li> </ul>                     | <ul style="list-style-type: none"> <li>Mass RT-PCR<sup>b</sup> testing using oropharyngeal and</li> </ul>                                                                                                                                                                                                                                                                                | <ul style="list-style-type: none"> <li>N/A</li> </ul>                                                                                                                                                                                                                                                                                                                                                                                                                                                                                                                                                                                                        | <ul style="list-style-type: none"> <li>A total of 238 cases were detected, of whom 109 were asymptomatic.</li> </ul>                                                                                                                                                                                                                                                                                                |

| Study                | Design/<br>setting                                                            | Sample                                                                                                              | Strategies                                                                                                | Assumptions                                             | Main findings                                                                                                                                                                                                                                   |
|----------------------|-------------------------------------------------------------------------------|---------------------------------------------------------------------------------------------------------------------|-----------------------------------------------------------------------------------------------------------|---------------------------------------------------------|-------------------------------------------------------------------------------------------------------------------------------------------------------------------------------------------------------------------------------------------------|
|                      |                                                                               |                                                                                                                     | nasopharyngeal swabs                                                                                      |                                                         | <ul style="list-style-type: none"> <li>• Mass testing permitted prompt isolation and monitoring of cases</li> </ul>                                                                                                                             |
| Nishiura et al [58]  | <ul style="list-style-type: none"> <li>• Cross-sectional in Japan</li> </ul>  | <ul style="list-style-type: none"> <li>• 565</li> </ul>                                                             | <ul style="list-style-type: none"> <li>• RT-PCR testing</li> </ul>                                        | <ul style="list-style-type: none"> <li>• N/A</li> </ul> | <ul style="list-style-type: none"> <li>• 63 passengers were symptomatic.</li> <li>• Four (30.8%, 95% CI: 7.7–53.8%) of 13 positive cases were asymptomatic and 9 were symptomatic</li> </ul>                                                    |
| Treibel et al [59]   | <ul style="list-style-type: none"> <li>• Cross-sectional in the UK</li> </ul> | <ul style="list-style-type: none"> <li>• 396</li> <li>• 284</li> <li>• 263</li> <li>• 267</li> <li>• 269</li> </ul> | <ul style="list-style-type: none"> <li>• PCR test on 400 nasopharyngeal swabs at 5-time points</li> </ul> | <ul style="list-style-type: none"> <li>• N/A</li> </ul> | <ul style="list-style-type: none"> <li>• Twelve (27%) of 44 positive cases were asymptomatic.</li> <li>• Positive. Fifty staff self-isolated as a result of symptoms</li> </ul>                                                                 |
| Abeyuriya et al [60] | <ul style="list-style-type: none"> <li>• Cross-sectional in the UK</li> </ul> | <ul style="list-style-type: none"> <li>• 180</li> </ul>                                                             | <ul style="list-style-type: none"> <li>• Nasopharyngeal swap PCR test</li> </ul>                          | <ul style="list-style-type: none"> <li>• N/A</li> </ul> | <ul style="list-style-type: none"> <li>• Seven women tested positive with 6 (85.7%, 95% CI: 42.1–99.6) as asymptomatic.</li> <li>• Symptom-based testing sensitivity was 14.3% (0.36–57.87) and specificity was 91.86% (86.72–95.48)</li> </ul> |
| Brown et al [61]     | <ul style="list-style-type: none"> <li>• Cross-sectional in the UK</li> </ul> | <ul style="list-style-type: none"> <li>• 1152</li> </ul>                                                            | <ul style="list-style-type: none"> <li>• Nasopharyngeal/oropharyngeal swap PCR tests</li> </ul>           | <ul style="list-style-type: none"> <li>• N/A</li> </ul> | <ul style="list-style-type: none"> <li>• Thirteen (57%) of 23 positive cases had symptoms compliant with COVID-19, of whom 4</li> </ul>                                                                                                         |



| Study                | Design/<br>setting                                                           | Sample                                                | Strategies                                                                                                                                                   | Assumptions                                           | Main findings                                                                                                                                                                                                                  |
|----------------------|------------------------------------------------------------------------------|-------------------------------------------------------|--------------------------------------------------------------------------------------------------------------------------------------------------------------|-------------------------------------------------------|--------------------------------------------------------------------------------------------------------------------------------------------------------------------------------------------------------------------------------|
|                      |                                                                              |                                                       |                                                                                                                                                              |                                                       | (17.4%) were asymptomatic                                                                                                                                                                                                      |
| Graham et al [62]    | <ul style="list-style-type: none"> <li>Cross-sectional in the UK</li> </ul>  | <ul style="list-style-type: none"> <li>383</li> </ul> | <ul style="list-style-type: none"> <li>Comprehensive testing with oropharyngeal and nasopharyngeal swabs</li> <li>Symptom screening</li> </ul>               | <ul style="list-style-type: none"> <li>N/A</li> </ul> | <ul style="list-style-type: none"> <li>126 (40%, 95% CI 35 to 46) of the 313 tested residents were positive.</li> <li>Only 72 (57%, 95% CI 49–66) positive cases would have been diagnosed based on symptom-testing</li> </ul> |
| Arons et al [63]     | <ul style="list-style-type: none"> <li>Cross-sectional in the USA</li> </ul> | <ul style="list-style-type: none"> <li>76</li> </ul>  | <ul style="list-style-type: none"> <li>Point prevalence testing with RT-PCR on nasopharyngeal and oropharyngeal swabs</li> </ul>                             | <ul style="list-style-type: none"> <li>N/A</li> </ul> | <ul style="list-style-type: none"> <li>48 (63%) of 76 tested residents were positive of whom 27 (56%) were asymptomatic. 24 of the 27 developed symptoms 1-week post-test</li> </ul>                                           |
| Jameson et al [64]   | <ul style="list-style-type: none"> <li>Cross-sectional in the USA</li> </ul> | <ul style="list-style-type: none"> <li>121</li> </ul> | <ul style="list-style-type: none"> <li>Universal testing</li> <li>Universal symptom: screening</li> <li>Isolation of cases (nasopharyngeal swabs)</li> </ul> | <ul style="list-style-type: none"> <li>N/A</li> </ul> | <ul style="list-style-type: none"> <li>No positive case was found among 121 out of 499 eligible healthcare workers screened</li> </ul>                                                                                         |
| Callaghan et al [65] | <ul style="list-style-type: none"> <li>Cross-sectional in the USA</li> </ul> | <ul style="list-style-type: none"> <li>217</li> </ul> | <ul style="list-style-type: none"> <li>Nasopharyngeal swap PCR test</li> </ul>                                                                               | <ul style="list-style-type: none"> <li>N/A</li> </ul> | <ul style="list-style-type: none"> <li>No participant tested positive for COVID-19</li> </ul>                                                                                                                                  |
| Louie et al [66]     | <ul style="list-style-type: none"> <li>Cross-sectional in the</li> </ul>     | <ul style="list-style-type: none"> <li>303</li> </ul> | <ul style="list-style-type: none"> <li>Outbreak response mass testing with PCR on</li> </ul>                                                                 | <ul style="list-style-type: none"> <li>N/A</li> </ul> | <ul style="list-style-type: none"> <li>Mass testing identified a high proportion of asymptomatic cases.</li> </ul>                                                                                                             |

| Study                   | Design/<br>setting                                                           | Sample                                                                              | Strategies                                                                                                                                                                               | Assumptions                                           | Main findings                                                                                                                                                                                                                                                             |
|-------------------------|------------------------------------------------------------------------------|-------------------------------------------------------------------------------------|------------------------------------------------------------------------------------------------------------------------------------------------------------------------------------------|-------------------------------------------------------|---------------------------------------------------------------------------------------------------------------------------------------------------------------------------------------------------------------------------------------------------------------------------|
|                         | USA                                                                          |                                                                                     | nasopharyngeal swabs                                                                                                                                                                     |                                                       | <ul style="list-style-type: none"> <li>The symptom-based screening was ineffective in detecting cases among healthcare workers</li> </ul>                                                                                                                                 |
| Gudbjartsson et al [67] | <ul style="list-style-type: none"> <li>Cross-sectional in Iceland</li> </ul> | <ul style="list-style-type: none"> <li>9199</li> <li>10797</li> <li>2283</li> </ul> | <ul style="list-style-type: none"> <li>Targeted testing</li> <li>Open invitation screening</li> <li>Random invitation screening (on nasopharyngeal and oropharyngeal samples)</li> </ul> | <ul style="list-style-type: none"> <li>N/A</li> </ul> | <ul style="list-style-type: none"> <li>13.3% tested positive in targeted testing, 0.8% in open invitation testing, and 0.6% in random invitation testing.</li> </ul>                                                                                                      |
| Reid et al [68]         | <ul style="list-style-type: none"> <li>Cross-sectional in Canada</li> </ul>  | <ul style="list-style-type: none"> <li>2751</li> </ul>                              | <ul style="list-style-type: none"> <li>Symptomatic testing</li> <li>Asymptomatic testing (on nasopharyngeal swabs)</li> </ul>                                                            | <ul style="list-style-type: none"> <li>N/A</li> </ul> | <ul style="list-style-type: none"> <li>188 (6.4%) positive cases detected during symptomatic testing and 5 (0.2%) positive cases during asymptomatic testing, with a low probability of testing positive</li> </ul>                                                       |
| Lavezzo et al [69]      | <ul style="list-style-type: none"> <li>Cross-sectional in Italy</li> </ul>   | <ul style="list-style-type: none"> <li>2812</li> <li>2343</li> </ul>                | <ul style="list-style-type: none"> <li>Pre and post-RT-PCR on nasopharyngeal swabs</li> </ul>                                                                                            | <ul style="list-style-type: none"> <li>N/A</li> </ul> | <ul style="list-style-type: none"> <li>The first survey gave a prevalence of 2.6% (95% CI: 2.1–3.3%) and 1.2% (95% CI: 0.8–1.8%) for survey 2. 29 (39.7%; 95% CI: 28.5–51.9%) of positive tests in the survey 1 were asymptomatic and 13 (44.8%; 95% CI: 26.5–</li> </ul> |

| Study                | Design/<br>setting                                                           | Sample                                                            | Strategies                                                                                                                                    | Assumptions                                           | Main findings                                                                                                                                                                                                               |
|----------------------|------------------------------------------------------------------------------|-------------------------------------------------------------------|-----------------------------------------------------------------------------------------------------------------------------------------------|-------------------------------------------------------|-----------------------------------------------------------------------------------------------------------------------------------------------------------------------------------------------------------------------------|
|                      |                                                                              |                                                                   |                                                                                                                                               |                                                       | 64.3%) in survey 2.                                                                                                                                                                                                         |
| Kimball et al [70]   | <ul style="list-style-type: none"> <li>Cross-sectional in the USA</li> </ul> | <ul style="list-style-type: none"> <li>76</li> </ul>              | <ul style="list-style-type: none"> <li>RT-PCR mass testing on nasopharyngeal and oropharyngeal swabs</li> </ul>                               | <ul style="list-style-type: none"> <li>N/A</li> </ul> | <ul style="list-style-type: none"> <li>Twenty-three (30%) residents were positive with 13 (57%) either presymptomatic or asymptomatic.</li> <li>Testing based on symptom screening could miss up to 50% of cases</li> </ul> |
| Olalla et al [71]    | <ul style="list-style-type: none"> <li>Cross-sectional in Spain</li> </ul>   | <ul style="list-style-type: none"> <li>498</li> </ul>             | <ul style="list-style-type: none"> <li>Symptom screening</li> <li>Asymptomatic testing (on nasopharyngeal and oropharyngeal swaps)</li> </ul> | <ul style="list-style-type: none"> <li>N/A</li> </ul> | <ul style="list-style-type: none"> <li>2 asymptomatic on day of sampling tested positive. 1 reported having had symptoms in the last 14 days</li> </ul>                                                                     |
| Guery et al [72]     | <ul style="list-style-type: none"> <li>Cross-sectional in France</li> </ul>  | <ul style="list-style-type: none"> <li>136</li> </ul>             | <ul style="list-style-type: none"> <li>RT-PCR mass testing on nasopharyngeal swap</li> </ul>                                                  | <ul style="list-style-type: none"> <li>N/A</li> </ul> | <ul style="list-style-type: none"> <li>Three (2.2%) cases detected, 1 of whom was symptomatic and the other developed symptoms within 24 hours</li> </ul>                                                                   |
| Roxby et al [73]     | <ul style="list-style-type: none"> <li>Cross-sectional in the USA</li> </ul> | <ul style="list-style-type: none"> <li>142</li> <li>80</li> </ul> | <ul style="list-style-type: none"> <li>Repeated RT-PCR mass testing on nasopharyngeal swap (7 days apart)</li> </ul>                          | <ul style="list-style-type: none"> <li>N/A</li> </ul> | <ul style="list-style-type: none"> <li>Five (7%) cases were detected, 3 of which were asymptomatic.</li> <li>Symptom-based testing might not identify all positive cases</li> </ul>                                         |
| Lytras et al(a) [74] | <ul style="list-style-type: none"> <li>Cross-sectional in</li> </ul>         | <ul style="list-style-type: none"> <li>357</li> </ul>             | <ul style="list-style-type: none"> <li>RT-PCR mass testing using nasopharyngeal</li> </ul>                                                    | <ul style="list-style-type: none"> <li>N/A</li> </ul> | <ul style="list-style-type: none"> <li>Thirteen (3.6%, CI: 2.0–6.1) positive asymptomatic cases</li> </ul>                                                                                                                  |

| Study                | Design/<br>setting           | Sample      | Strategies                                                              | Assumptions | Main findings                                                                                                                                                                                                                      |
|----------------------|------------------------------|-------------|-------------------------------------------------------------------------|-------------|------------------------------------------------------------------------------------------------------------------------------------------------------------------------------------------------------------------------------------|
|                      | Greece                       |             | swap                                                                    |             |                                                                                                                                                                                                                                    |
| Lytras et al(b) [74] | • Cross-sectional in Greece  | • 394       | • RT-PCR mass testing on nasopharyngeal swaps                           | • N/A       | • Twenty-five (6.3%, 95% CI: 4.1–9.2%) positive asymptomatic cases                                                                                                                                                                 |
| Lytras et al(c) [74] | • Cross-sectional in Greece  | • 32        | • RT-PCR mass testing on nasopharyngeal swap                            | • N/A       | • Two (6.3%, 95% CI: 0.8–20.8%) positive asymptomatic cases                                                                                                                                                                        |
| Hoehl et al [75]     | • Cross-sectional in Germany | • 114       | • RT-PCR mass testing on nasopharyngeal swap and sputum                 | • N/A       | <ul style="list-style-type: none"> <li>• Two (1.8%) of 114 asymptomatic passengers tested positive. All 11 symptomatic patients tested negative.</li> <li>• Symptom-based testing failed to detect SARS-CoV-2 patients.</li> </ul> |
| Cao et al [76]       | • Cross-sectional in China   | • 9,899,828 | • Citywide mass testing using TR-PCR on nasopharyngeal and throat swabs | • N/A       | • No symptomatic case was found compared to 300 asymptomatic cases (0.303/10,000, 95% CI; 0.270–0.339/10,000)                                                                                                                      |
| Baggett et al [77]   | • Cross-sectional in the USA | • 408       | • Mass testing<br>• Symptom screening (on nasopharyngeal swaps)         | • N/A       | • 147 (36.0%) subjects tested positive, of whom 87.8% were asymptomatic                                                                                                                                                            |
| Imbert et al         | • Cross-section              | • 210       | • Mass RT-PCR testing on                                                | • N/A       | • Fifty-two (52%) of tested residents were                                                                                                                                                                                         |

| Study | Design/<br>setting | Sample | Strategies                  | Assumptions | Main findings                                                                           |
|-------|--------------------|--------|-----------------------------|-------------|-----------------------------------------------------------------------------------------|
| [78]  | al in the<br>USA   |        | nasopharyngeal<br>specimens |             | asymptomatic. This<br>occurred when registered<br>incidence was 5.1 case per<br>100,000 |

<sup>a</sup>Mass testing of individuals with high contact rates (at-risk group)

<sup>b</sup>Reverse transcription-polymerase chain reaction
