# Supplementary material
Source: PubMed Central journal article supplement (PMC10414231)
Supplement: xmed_v2i2e27254_app2.pdf [file xmed_v2i2e27254_app2.pdf]

**Table S1: Characteristics of Excluded Studies**

| Study               | Design/ Outcome                                                                                                              | Sample/ setting                                                                                                     | Strategies                                                                                                                                                                                                                                                                          | Reason for exclusion                                                    |
|---------------------|------------------------------------------------------------------------------------------------------------------------------|---------------------------------------------------------------------------------------------------------------------|-------------------------------------------------------------------------------------------------------------------------------------------------------------------------------------------------------------------------------------------------------------------------------------|-------------------------------------------------------------------------|
| Maslov [79]         | <ul style="list-style-type: none"> <li>Logical description</li> <li>Economic benefits</li> </ul>                             | <ul style="list-style-type: none"> <li>Non</li> </ul>                                                               | <ul style="list-style-type: none"> <li>Random mass testing</li> </ul>                                                                                                                                                                                                               | <ul style="list-style-type: none"> <li>No comparator</li> </ul>         |
| Peto et al [80]     | <ul style="list-style-type: none"> <li>Modeling study</li> <li>Reproduction number</li> <li>Number of daily tests</li> </ul> | <ul style="list-style-type: none"> <li>Hypothetical sample in the UK</li> </ul>                                     | <ul style="list-style-type: none"> <li>Weekly mass test and trace using isothermal single-step reverse transcription-polymerase chain reaction (RT-PCR)</li> </ul>                                                                                                                  | <ul style="list-style-type: none"> <li>No comparator</li> </ul>         |
| Domenico et al [81] | <ul style="list-style-type: none"> <li>Modeling study</li> <li>Lockdown impact</li> <li>Number of contacts</li> </ul>        | <ul style="list-style-type: none"> <li>Age profile data of Ile-de- France and 2012 social contact matrix</li> </ul> | <ul style="list-style-type: none"> <li>School closure</li> <li>Employee telework from home</li> <li>Senior isolation (high-risk group)</li> <li>Lockdown and non-essential activity ban</li> <li>Case isolation with large-scale testing</li> </ul>                                 | <ul style="list-style-type: none"> <li>Unsuitable comparator</li> </ul> |
| Quilty et al [82]   | <ul style="list-style-type: none"> <li>Modeling study</li> <li>Infected travelers</li> </ul>                                 | <ul style="list-style-type: none"> <li>Air travelers</li> </ul>                                                     | <ul style="list-style-type: none"> <li>Symptoms screening</li> </ul>                                                                                                                                                                                                                | <ul style="list-style-type: none"> <li>Unsuitable design</li> </ul>     |
| Gostic et al [83]   | <ul style="list-style-type: none"> <li>Modeling study</li> <li>Screening outcome and missed cases</li> </ul>                 | <ul style="list-style-type: none"> <li>A hypothetical population of infected travelers</li> </ul>                   | <ul style="list-style-type: none"> <li>Symptomatic but not aware of exposure risk</li> <li>Aware of exposure risk but without detectable symptoms</li> <li>Symptomatic and aware that exposure may have occurred</li> <li>Neither symptomatic nor aware of exposure risk</li> </ul> | <ul style="list-style-type: none"> <li>Lack of intervention</li> </ul>  |

| Study                | Design/ Outcome                                                                                                                         | Sample/ setting                                                                                                        | Strategies                                                                                                                                                                                                                                                                                                                                                                        | Reason for exclusion                                                                               |
|----------------------|-----------------------------------------------------------------------------------------------------------------------------------------|------------------------------------------------------------------------------------------------------------------------|-----------------------------------------------------------------------------------------------------------------------------------------------------------------------------------------------------------------------------------------------------------------------------------------------------------------------------------------------------------------------------------|----------------------------------------------------------------------------------------------------|
| Kucharski et al [84] | <ul style="list-style-type: none"> <li>Modeling study</li> <li>Reduction in transmission</li> <li>Daily contacts quarantined</li> </ul> | <ul style="list-style-type: none"> <li>40,162 participants and BBC 2017-18 social contact dataset in the UK</li> </ul> | <ul style="list-style-type: none"> <li>No control measures.</li> <li>Self-isolation of symptomatic cases</li> <li>Household quarantine</li> <li>Quarantine of work or school contacts</li> <li>Manual tracing of acquaintances</li> <li>Manual tracing of all contacts</li> <li>App-based tracing</li> <li>Mass testing</li> <li>Daily limit of other setting contacts</li> </ul> | <ul style="list-style-type: none"> <li>Unsuitable design. No comparison</li> </ul>                 |
| Kirshblum et al [85] | <ul style="list-style-type: none"> <li>Retrospective study</li> <li>Test results and symptoms onset</li> </ul>                          | <ul style="list-style-type: none"> <li>103 admitted patients in the Rehabilitation hospital in the USA</li> </ul>      | <ul style="list-style-type: none"> <li>Analysis of samples collected at the time of admission</li> </ul>                                                                                                                                                                                                                                                                          | <ul style="list-style-type: none"> <li>Unsuitable design</li> </ul>                                |
| Firth et al [86]     | <ul style="list-style-type: none"> <li>Modeling study</li> <li>Number of tests</li> <li>Number of contacts</li> </ul>                   | <ul style="list-style-type: none"> <li>468 real-world social network data in the UK</li> </ul>                         | <ul style="list-style-type: none"> <li>Outbreak progress under no intervention</li> <li>Outbreak progress under case isolation</li> <li>Outbreak progress under primary contact tracing</li> <li>Outbreak progress under secondary contact tracing</li> </ul>                                                                                                                     | <ul style="list-style-type: none"> <li>Contact tracing limited to symptom-based testing</li> </ul> |
| Keeling et al [87]   | <ul style="list-style-type: none"> <li>Cross-sectional survey</li> <li>Tracing efficacy</li> </ul>                                      | <ul style="list-style-type: none"> <li>More than 5802 subjects reporting more</li> </ul>                               | <ul style="list-style-type: none"> <li>N/A</li> </ul>                                                                                                                                                                                                                                                                                                                             | <ul style="list-style-type: none"> <li>Contact tracing limited to</li> </ul>                       |

| Study                  | Design/ Outcome                                                                                                                        | Sample/ setting                                                                              | Strategies                                                                                                                                                                                                                                                                                                                                                                                                                        | Reason for exclusion                                                                               |
|------------------------|----------------------------------------------------------------------------------------------------------------------------------------|----------------------------------------------------------------------------------------------|-----------------------------------------------------------------------------------------------------------------------------------------------------------------------------------------------------------------------------------------------------------------------------------------------------------------------------------------------------------------------------------------------------------------------------------|----------------------------------------------------------------------------------------------------|
|                        | <ul style="list-style-type: none"> <li>Distribution of secondary cases</li> </ul>                                                      | <p>than 50,000 contacts in the UK</p>                                                        |                                                                                                                                                                                                                                                                                                                                                                                                                                   | <p>symptom-based testing</p>                                                                       |
| Bilinski et al [88]    | <ul style="list-style-type: none"> <li>Modeling study</li> <li>% reduction in reproduction number (R)</li> </ul>                       | <ul style="list-style-type: none"> <li>Hypothetical in the US</li> </ul>                     | <ul style="list-style-type: none"> <li>Symptom testing with 30% isolation and quarantine.</li> <li>Test all individuals, with 30% isolation and quarantine.</li> <li>Symptom testing with 60% isolation and quarantine.</li> <li>Test all individuals, with 60% isolation and quarantine.</li> <li>Symptom testing, with 90% isolation and quarantine</li> <li>Test all individuals, with 90% isolation and quarantine</li> </ul> | <ul style="list-style-type: none"> <li>Contact tracing limited to symptom-based testing</li> </ul> |
| Kretzschmar et al [89] | <ul style="list-style-type: none"> <li>Modeling study</li> <li>Reduction in the reproduction number</li> </ul>                         | <ul style="list-style-type: none"> <li>Hypothetical sample in the Netherlands</li> </ul>     | <ul style="list-style-type: none"> <li>Conventional contact tracing</li> <li>Mobile app contact tracing</li> <li>Physical distancing strategy</li> <li>Testing and isolation of cases without tracing contacts</li> </ul>                                                                                                                                                                                                         | <ul style="list-style-type: none"> <li>Contact tracing limited to symptom-based testing</li> </ul> |
| Skoll et al [90]       | <ul style="list-style-type: none"> <li>Non-systematic review</li> <li>Role of technology, barriers, and scale-up strategies</li> </ul> | <ul style="list-style-type: none"> <li>N/A</li> </ul>                                        | <ul style="list-style-type: none"> <li>Digital contact tracing and mass testing</li> </ul>                                                                                                                                                                                                                                                                                                                                        | <ul style="list-style-type: none"> <li>Unsuitable design</li> </ul>                                |
| Kerr et al [91]        | <ul style="list-style-type: none"> <li>Modeling study</li> <li>Feasibility of control strategies</li> </ul>                            | <ul style="list-style-type: none"> <li>Demographic, mobility, and epidemiological</li> </ul> | <ul style="list-style-type: none"> <li>Test and trace (testing, contact tracing, and quarantine)</li> </ul>                                                                                                                                                                                                                                                                                                                       | <ul style="list-style-type: none"> <li>Limited to control</li> </ul>                               |

| Study                         | Design/ Outcome                                                                                                                  | Sample/ setting                                                                                   | Strategies                                                                                                                                                                                                                                                                                           | Reason for exclusion                                                                               |
|-------------------------------|----------------------------------------------------------------------------------------------------------------------------------|---------------------------------------------------------------------------------------------------|------------------------------------------------------------------------------------------------------------------------------------------------------------------------------------------------------------------------------------------------------------------------------------------------------|----------------------------------------------------------------------------------------------------|
|                               |                                                                                                                                  | data of Seattle in the USA                                                                        |                                                                                                                                                                                                                                                                                                      |                                                                                                    |
| Panovska-Griffiths et al [92] | <ul style="list-style-type: none"> <li>Modeling study</li> <li>Reduction in the reproduction number</li> </ul>                   | <ul style="list-style-type: none"> <li>Modeled sample in the UK</li> </ul>                        | <ul style="list-style-type: none"> <li>Full-time schooling</li> <li>Part-time weekly rota system of 50% each schooling</li> <li>68% contact tracing with no scale-up in testing</li> <li>68% contact tracing with sufficient testing</li> <li>40% contact tracing with sufficient testing</li> </ul> | <ul style="list-style-type: none"> <li>No suitable comparison</li> </ul>                           |
| Hellewell et al [93]          | <ul style="list-style-type: none"> <li>Modeling study</li> <li>Onward transmission</li> </ul>                                    | <ul style="list-style-type: none"> <li>Modeled sample in the UK</li> </ul>                        | <ul style="list-style-type: none"> <li>5, 20, and 40 initial cases of the outbreak</li> <li>0, 0.2, 0.4, 0.6, 0.8 and 1 probabilities of tracing a contact</li> <li>Short symptom onset to isolation</li> <li>Long symptom onset to isolation</li> </ul>                                             | <ul style="list-style-type: none"> <li>Contact tracing limited to symptom-based testing</li> </ul> |
| Ferretti et al [94]           | <ul style="list-style-type: none"> <li>Modeling study</li> <li>Basic reproduction number (R)</li> <li>Generation time</li> </ul> | <ul style="list-style-type: none"> <li>Pair of 40 hypothetical recipients in Singapore</li> </ul> | <ul style="list-style-type: none"> <li>Symptomatic transmission</li> <li>Presymptomatic transmission</li> <li>Asymptomatic transmission</li> <li>Environmental transmission</li> <li>Isolating symptomatic persons</li> <li>Tracing the contacts of symptomatic cases and quarantining</li> </ul>    | <ul style="list-style-type: none"> <li>Contact tracing limited to symptom-based testing</li> </ul> |
| Min et al [95]                | <ul style="list-style-type: none"> <li>Modeling study</li> <li>Epidemic size</li> </ul>                                          | <ul style="list-style-type: none"> <li>Daily COVID-19 reported cases (Feb12-</li> </ul>           | <ul style="list-style-type: none"> <li>Social distancing among adults</li> <li>Spring semester postponement</li> </ul>                                                                                                                                                                               | <ul style="list-style-type: none"> <li>No suitable comparator</li> </ul>                           |

| Study                      | Design/ Outcome                                                                                                   | Sample/ setting                                                                                                                                                                | Strategies                                                                                                                                                                                                                                                                                                                                                                                                                    | Reason for exclusion                                                                               |
|----------------------------|-------------------------------------------------------------------------------------------------------------------|--------------------------------------------------------------------------------------------------------------------------------------------------------------------------------|-------------------------------------------------------------------------------------------------------------------------------------------------------------------------------------------------------------------------------------------------------------------------------------------------------------------------------------------------------------------------------------------------------------------------------|----------------------------------------------------------------------------------------------------|
|                            | <ul style="list-style-type: none"> <li>Effective contact rate</li> </ul>                                          | March3) in Korea                                                                                                                                                               | <ul style="list-style-type: none"> <li>Intensive contact tracing</li> <li>Large-scale diagnostic testing</li> </ul>                                                                                                                                                                                                                                                                                                           |                                                                                                    |
| He et al [96]              | <ul style="list-style-type: none"> <li>Modeling study</li> <li>Required resources</li> <li>Effect on R</li> </ul> | <ul style="list-style-type: none"> <li>40,162 BBC pandemic data in the UK</li> </ul>                                                                                           | <ul style="list-style-type: none"> <li>Symptom-based contact tracing</li> <li>Test-based contact tracing</li> <li>Testing of asymptomatic contacts</li> </ul>                                                                                                                                                                                                                                                                 | <ul style="list-style-type: none"> <li>Contact tracing limited to symptom-based testing</li> </ul> |
| Goscé et al [97]           | <ul style="list-style-type: none"> <li>Modeling study</li> </ul>                                                  | <ul style="list-style-type: none"> <li>PHE<sup>a</sup>, NHS<sup>b</sup>, and TfL<sup>c</sup> data</li> <li>Royal Borough of Kensington and Chelsea (RBKC) in the UK</li> </ul> | <ul style="list-style-type: none"> <li>Isolation of RBKC residents from the rest of the city</li> <li>Removal of lockdown</li> <li>Weekly testing (business reopens but people work from home)</li> <li>Shielding 60+ age group with the lifting of lockdown</li> <li>Combined universal testing and use of face coverings with no lockdown.</li> <li>- Universal testing, contact tracing and isolation, lockdown</li> </ul> | <ul style="list-style-type: none"> <li>Unsuitable design</li> </ul>                                |
| Li et al [98]              | <ul style="list-style-type: none"> <li>Descriptive study</li> </ul>                                               | <ul style="list-style-type: none"> <li>N/A</li> </ul>                                                                                                                          | <ul style="list-style-type: none"> <li>Containment</li> <li>Suppression</li> </ul>                                                                                                                                                                                                                                                                                                                                            | <ul style="list-style-type: none"> <li>Unsuitable design</li> </ul>                                |
| Kennedy-Shaffer et al [99] | <ul style="list-style-type: none"> <li>Modeling study</li> <li>Reduction in transmissions</li> </ul>              | <ul style="list-style-type: none"> <li>Unknown</li> </ul>                                                                                                                      | <ul style="list-style-type: none"> <li>Hypothetical rapid test</li> <li>Transmission tracing</li> <li>Full isolation of all contacts of cases</li> <li>Isolate contacts with positive test results</li> </ul>                                                                                                                                                                                                                 | <ul style="list-style-type: none"> <li>Unsuitable design</li> </ul>                                |
| Campbell et al [100]       | <ul style="list-style-type: none"> <li>Cross sectional</li> </ul>                                                 | <ul style="list-style-type: none"> <li>41,751</li> </ul>                                                                                                                       | <ul style="list-style-type: none"> <li>Systematic trace and test contacts</li> </ul>                                                                                                                                                                                                                                                                                                                                          | <ul style="list-style-type: none"> <li>No suitable comparator</li> </ul>                           |

| Study                    | Design/ Outcome                                                                                                                 | Sample/ setting                                                                                                                                                                             | Strategies                                                                                                                                                                                                                                                                                                          | Reason for exclusion                                                      |
|--------------------------|---------------------------------------------------------------------------------------------------------------------------------|---------------------------------------------------------------------------------------------------------------------------------------------------------------------------------------------|---------------------------------------------------------------------------------------------------------------------------------------------------------------------------------------------------------------------------------------------------------------------------------------------------------------------|---------------------------------------------------------------------------|
|                          | <ul style="list-style-type: none"> <li>• Cost, human resource and lab capacity</li> </ul>                                       | <ul style="list-style-type: none"> <li>• COVID-19 contacts, the staff of hospitals, health centers, care homes &amp; essential businesses, school children &amp; staff in Canada</li> </ul> | <ul style="list-style-type: none"> <li>• Test all staff in acute care hospitals.</li> <li>• Test all community health workers and staff/residents of long-term care homes</li> <li>• Test all major public and interpersonal contact essential workers</li> <li>• Test all children and staff of schools</li> </ul> |                                                                           |
| Cleevely et al [101]     | <ul style="list-style-type: none"> <li>• Modeling study</li> </ul>                                                              | <ul style="list-style-type: none"> <li>• Hypothetical sample in the UK</li> </ul>                                                                                                           | <ul style="list-style-type: none"> <li>• Stratified periodic sample testing</li> <li>• Universal random testing</li> </ul>                                                                                                                                                                                          | <ul style="list-style-type: none"> <li>• Unsuitable comparator</li> </ul> |
| Yokota et al [102]       | <ul style="list-style-type: none"> <li>• Diagnostic tests</li> <li>• The utility of nucleic acid amplification</li> </ul>       | <ul style="list-style-type: none"> <li>• 1924 asymptomatic persons in Japan</li> </ul>                                                                                                      | <ul style="list-style-type: none"> <li>• Nasopharyngeal swap-based (NPS) RT-PCR test</li> <li>• Saliva-based PCR test</li> </ul>                                                                                                                                                                                    | <ul style="list-style-type: none"> <li>• Unsuitable design</li> </ul>     |
| Eilersen & Sneppen [103] | <ul style="list-style-type: none"> <li>• Modeling study</li> <li>• Quarantine measures</li> <li>• Cost-effectiveness</li> </ul> | <ul style="list-style-type: none"> <li>• Hypothetical sample</li> </ul>                                                                                                                     | <ul style="list-style-type: none"> <li>• No intervention</li> <li>• Reduced work contacts by 75%</li> <li>• Reduced social contacts by 75%</li> <li>• Infection probability reduced by 50%</li> <li>• Workplace size reduced by half</li> <li>• Infection probability plus workplace size reduced</li> </ul>        | <ul style="list-style-type: none"> <li>• Limited to control</li> </ul>    |
| Altawalah et al [104]    | <ul style="list-style-type: none"> <li>• Cross-sectional study</li> <li>• Detection of SARS-CoV-2 in saliva</li> </ul>          | <ul style="list-style-type: none"> <li>• 891 suspects in Kuwait</li> </ul>                                                                                                                  | <ul style="list-style-type: none"> <li>• Nasopharyngeal swap-based (NPS) RT-PCR test</li> <li>• Saliva-based PCR test</li> </ul>                                                                                                                                                                                    | <ul style="list-style-type: none"> <li>• Unsuitable design</li> </ul>     |

| Study               | Design/ Outcome                                                                                   | Sample/ setting                                                                                                         | Strategies                                                                                                 | Reason for exclusion                                                               |
|---------------------|---------------------------------------------------------------------------------------------------|-------------------------------------------------------------------------------------------------------------------------|------------------------------------------------------------------------------------------------------------|------------------------------------------------------------------------------------|
| Dollard et al [105] | <ul style="list-style-type: none"> <li>Diagnostic test</li> <li>COVID-19 infections</li> </ul>    | <ul style="list-style-type: none"> <li>298 air travelers in the USA</li> </ul>                                          | <ul style="list-style-type: none"> <li>Reverse transcription-polymerase chain reaction (RT-PCR)</li> </ul> | <ul style="list-style-type: none"> <li>Asymptomatic proportions unknown</li> </ul> |
| Telford et al [106] | <ul style="list-style-type: none"> <li>Cross-sectional</li> <li>Timing of mass testing</li> </ul> | <ul style="list-style-type: none"> <li>5671 residents &amp; staff in 28 long term care facilities in the USA</li> </ul> | <ul style="list-style-type: none"> <li>Mass RT-PCR test</li> </ul>                                         | <ul style="list-style-type: none"> <li>Asymptomatic proportion unknown</li> </ul>  |
| Bosetti et al [107] | <ul style="list-style-type: none"> <li>Modeling study</li> <li>Impact of intervention</li> </ul>  | <ul style="list-style-type: none"> <li>Real-time COVID-19 data in France</li> </ul>                                     | <ul style="list-style-type: none"> <li>Mass testing</li> </ul>                                             | <ul style="list-style-type: none"> <li>No comparator</li> </ul>                    |

<sup>a</sup> PHE = Public Health England

<sup>b</sup> NHS = National Health Service

<sup>c</sup> TfL = Transport for London
