# Supplementary material
Source: PubMed Central journal article supplement (PMC10414231)
Supplement: xmed_v2i2e27254_app3.pdf [file xmed_v2i2e27254_app3.pdf]

**Table S1: Quality Assessment of Modeling Studies**

| Relevance and Credibility of Modeling Studies for Informing Health Care Decision Making |                             |                                         |                                    |                                                         |                                                                                                |                                                                                                  |                                                                                         |                                                                |                                                                               |                                                                                       |                                                                 |                                                                          |                                                          |                                                 |                                                                                   |
|-----------------------------------------------------------------------------------------|-----------------------------|-----------------------------------------|------------------------------------|---------------------------------------------------------|------------------------------------------------------------------------------------------------|--------------------------------------------------------------------------------------------------|-----------------------------------------------------------------------------------------|----------------------------------------------------------------|-------------------------------------------------------------------------------|---------------------------------------------------------------------------------------|-----------------------------------------------------------------|--------------------------------------------------------------------------|----------------------------------------------------------|-------------------------------------------------|-----------------------------------------------------------------------------------|
| Study                                                                                   | Relevance                   |                                         |                                    |                                                         | Credibility                                                                                    |                                                                                                  |                                                                                         |                                                                |                                                                               |                                                                                       |                                                                 |                                                                          |                                                          |                                                 |                                                                                   |
|                                                                                         |                             |                                         |                                    |                                                         | Validation                                                                                     |                                                                                                  |                                                                                         | Design                                                         | Data                                                                          | Analysis                                                                              |                                                                 | Reporting                                                                | Interpretation                                           | Conflict of interest                            |                                                                                   |
|                                                                                         | Is the population relevant? | Are any critical interventions missing? | Are any relevant outcomes missing? | Is the context (settings and circumstances) applicable? | Is external validation of the model sufficient to make its results credible for your decision? | Is internal verification of the model sufficient to make its results credible for your decision? | Does the model have sufficient validity to make its results credible for your decision? | Is the design of the model adequate for your decision problem? | Are the data used in populating the model suitable for your decision problem? | Were the analysis performed using the model adequate to inform your decision problem? | Was there an adequate assessment of the effects of uncertainty? | Was the reporting of the model adequate to inform your decision problem? | Was the interpretation of the results fair and balanced? | Were there any potential conflicts of interest? | If there were potential conflicts of interest, were steps taken to address these? |
| <b>Effectiveness</b>                                                                    |                             |                                         |                                    |                                                         |                                                                                                |                                                                                                  |                                                                                         |                                                                |                                                                               |                                                                                       |                                                                 |                                                                          |                                                          |                                                 |                                                                                   |
| Emery et al [44]                                                                        | No                          | No                                      | No                                 | No                                                      | Yes                                                                                            | Yes                                                                                              | Yes                                                                                     | Yes                                                            | Yes                                                                           | Yes                                                                                   | Yes                                                             | Yes                                                                      | Yes                                                      | No                                              | N/A                                                                               |
| Grassly et al [45]                                                                      | Yes                         | No                                      | No                                 | Yes                                                     | Yes                                                                                            | Yes                                                                                              | Yes                                                                                     | Yes                                                            | Yes                                                                           | Yes                                                                                   | Yes                                                             | Yes                                                                      | Yes                                                      | No                                              | N/A                                                                               |

## Relevance and Credibility of Modeling Studies for Informing Health Care Decision Making

| Study               | Relevance                   |                                         |                                    |                                                         | Credibility                                                                                    |                                                                                                  |                                                                                         |                                                                |                                                                               |                                                                                       |                                                                 |                                                                          |                                                          |                                                 |                                                                                   |
|---------------------|-----------------------------|-----------------------------------------|------------------------------------|---------------------------------------------------------|------------------------------------------------------------------------------------------------|--------------------------------------------------------------------------------------------------|-----------------------------------------------------------------------------------------|----------------------------------------------------------------|-------------------------------------------------------------------------------|---------------------------------------------------------------------------------------|-----------------------------------------------------------------|--------------------------------------------------------------------------|----------------------------------------------------------|-------------------------------------------------|-----------------------------------------------------------------------------------|
|                     |                             |                                         |                                    |                                                         | Validation                                                                                     |                                                                                                  |                                                                                         | Design                                                         | Data                                                                          | Analysis                                                                              |                                                                 | Reporting                                                                | Interpretation                                           | Conflict of interest                            |                                                                                   |
|                     | Is the population relevant? | Are any critical interventions missing? | Are any relevant outcomes missing? | Is the context (settings and circumstances) applicable? | Is external validation of the model sufficient to make its results credible for your decision? | Is internal verification of the model sufficient to make its results credible for your decision? | Does the model have sufficient validity to make its results credible for your decision? | Is the design of the model adequate for your decision problem? | Are the data used in populating the model suitable for your decision problem? | Were the analysis performed using the model adequate to inform your decision problem? | Was there an adequate assessment of the effects of uncertainty? | Was the reporting of the model adequate to inform your decision problem? | Was the interpretation of the results fair and balanced? | Were there any potential conflicts of interest? | If there were potential conflicts of interest, were steps taken to address these? |
| Tsou et al [46]     | No                          | No                                      | No                                 | No                                                      | Yes                                                                                            | No                                                                                               | Yes                                                                                     | Yes                                                            | No                                                                            | No                                                                                    | Yes                                                             | Yes                                                                      | Yes                                                      | Can't answer                                    | Not reported                                                                      |
| Mizumoto et al [47] | No                          | Yes                                     | No                                 | No                                                      | Yes                                                                                            | No                                                                                               | Yes                                                                                     | Yes                                                            | Yes                                                                           | Yes                                                                                   | No                                                              | Yes                                                                      | Yes                                                      | No                                              | N/A                                                                               |
| Sasmita et al [48]  | No                          | No                                      | No                                 | No                                                      | Yes                                                                                            | No                                                                                               | Yes                                                                                     | Yes                                                            | No                                                                            | No                                                                                    | Yes                                                             | Insufficient information                                                 | Yes                                                      | No                                              | N/A                                                                               |



## Relevance and Credibility of Modeling Studies for Informing Health Care Decision Making

| Study               | Relevance                   |                                         |                                    |                                                         | Credibility                                                                                    |                                                                                                  |                                                                                         |                                                                |                                                                               |                                                                                       |                                                                 |                                                                          |                                                          |                                                 |                                                                                   |              |
|---------------------|-----------------------------|-----------------------------------------|------------------------------------|---------------------------------------------------------|------------------------------------------------------------------------------------------------|--------------------------------------------------------------------------------------------------|-----------------------------------------------------------------------------------------|----------------------------------------------------------------|-------------------------------------------------------------------------------|---------------------------------------------------------------------------------------|-----------------------------------------------------------------|--------------------------------------------------------------------------|----------------------------------------------------------|-------------------------------------------------|-----------------------------------------------------------------------------------|--------------|
|                     |                             |                                         |                                    |                                                         | Validation                                                                                     |                                                                                                  |                                                                                         | Design                                                         | Data                                                                          | Analysis                                                                              |                                                                 | Reporting                                                                | Interpretation                                           | Conflict of interest                            |                                                                                   |              |
|                     | Is the population relevant? | Are any critical interventions missing? | Are any relevant outcomes missing? | Is the context (settings and circumstances) applicable? | Is external validation of the model sufficient to make its results credible for your decision? | Is internal verification of the model sufficient to make its results credible for your decision? | Does the model have sufficient validity to make its results credible for your decision? | Is the design of the model adequate for your decision problem? | Are the data used in populating the model suitable for your decision problem? | Were the analysis performed using the model adequate to inform your decision problem? | Was there an adequate assessment of the effects of uncertainty? | Was the reporting of the model adequate to inform your decision problem? | Was the interpretation of the results fair and balanced? | Were there any potential conflicts of interest? | If there were potential conflicts of interest, were steps taken to address these? |              |
| Pollmann et al [51] | Yes                         | No                                      | No                                 | Yes                                                     | No                                                                                             | No                                                                                               | Yes                                                                                     | Yes                                                            | Not enough information                                                        | Yes                                                                                   | Yes                                                             | Yes                                                                      | Yes                                                      | Yes                                             | Can't answer                                                                      | Not reported |
| Hill et al [52]     | Yes                         | No                                      | No                                 | Yes                                                     | Yes                                                                                            | Yes                                                                                              | Yes                                                                                     | Yes                                                            | Yes                                                                           | Yes                                                                                   | Yes                                                             | Yes                                                                      | Yes                                                      | Yes                                             | No                                                                                | N/A          |
| Gorji et al [53]    | No                          | No                                      | No                                 | No                                                      | No                                                                                             | Yes                                                                                              | Yes                                                                                     | Yes                                                            | No                                                                            | Yes                                                                                   | Yes                                                             | Yes                                                                      | Yes                                                      | Yes                                             | Can't                                                                             | Not reported |

Relevance and Credibility of Modeling Studies for Informing Health Care Decision Making

| Study                     | Relevance                   |                                         |                                    |                                                         | Credibility                                                                                    |                                                                                                  |                                                                                         |                                                                |                                                                               |                                                                                       |                                                                 |                                                                          |                                                          |                                                 |                                                                                   |              |
|---------------------------|-----------------------------|-----------------------------------------|------------------------------------|---------------------------------------------------------|------------------------------------------------------------------------------------------------|--------------------------------------------------------------------------------------------------|-----------------------------------------------------------------------------------------|----------------------------------------------------------------|-------------------------------------------------------------------------------|---------------------------------------------------------------------------------------|-----------------------------------------------------------------|--------------------------------------------------------------------------|----------------------------------------------------------|-------------------------------------------------|-----------------------------------------------------------------------------------|--------------|
|                           |                             |                                         |                                    |                                                         | Validation                                                                                     |                                                                                                  |                                                                                         | Design                                                         | Data                                                                          | Analysis                                                                              |                                                                 | Reporting                                                                | Interpretation                                           | Conflict of interest                            |                                                                                   |              |
|                           | Is the population relevant? | Are any critical interventions missing? | Are any relevant outcomes missing? | Is the context (settings and circumstances) applicable? | Is external validation of the model sufficient to make its results credible for your decision? | Is internal verification of the model sufficient to make its results credible for your decision? | Does the model have sufficient validity to make its results credible for your decision? | Is the design of the model adequate for your decision problem? | Are the data used in populating the model suitable for your decision problem? | Were the analysis performed using the model adequate to inform your decision problem? | Was there an adequate assessment of the effects of uncertainty? | Was the reporting of the model adequate to inform your decision problem? | Was the interpretation of the results fair and balanced? | Were there any potential conflicts of interest? | If there were potential conflicts of interest, were steps taken to address these? |              |
| Alsing et al [54]         | Yes                         | No                                      | No                                 | Yes                                                     | Yes                                                                                            | Not enough information                                                                           | Yes                                                                                     | Yes                                                            | No                                                                            | Yes                                                                                   | Yes                                                             | Yes                                                                      | Yes                                                      | Yes                                             | answer Can't answer                                                               | Not reported |
| <b>Cost-Effectiveness</b> |                             |                                         |                                    |                                                         |                                                                                                |                                                                                                  |                                                                                         |                                                                |                                                                               |                                                                                       |                                                                 |                                                                          |                                                          |                                                 |                                                                                   |              |

## Relevance and Credibility of Modeling Studies for Informing Health Care Decision Making

| Study              | Relevance                   |                                         |                                    |                                                         | Credibility                                                                                    |                                                                                                  |                                                                                         |                                                                |                                                                               |                                                                                       |                                                                 |                                                                          |                                                          |                                                 |                                                                                   |     |
|--------------------|-----------------------------|-----------------------------------------|------------------------------------|---------------------------------------------------------|------------------------------------------------------------------------------------------------|--------------------------------------------------------------------------------------------------|-----------------------------------------------------------------------------------------|----------------------------------------------------------------|-------------------------------------------------------------------------------|---------------------------------------------------------------------------------------|-----------------------------------------------------------------|--------------------------------------------------------------------------|----------------------------------------------------------|-------------------------------------------------|-----------------------------------------------------------------------------------|-----|
|                    |                             |                                         |                                    |                                                         | Validation                                                                                     |                                                                                                  |                                                                                         | Design                                                         | Data                                                                          | Analysis                                                                              |                                                                 | Reporting                                                                | Interpretation                                           | Conflict of interest                            |                                                                                   |     |
|                    | Is the population relevant? | Are any critical interventions missing? | Are any relevant outcomes missing? | Is the context (settings and circumstances) applicable? | Is external validation of the model sufficient to make its results credible for your decision? | Is internal verification of the model sufficient to make its results credible for your decision? | Does the model have sufficient validity to make its results credible for your decision? | Is the design of the model adequate for your decision problem? | Are the data used in populating the model suitable for your decision problem? | Were the analysis performed using the model adequate to inform your decision problem? | Was there an adequate assessment of the effects of uncertainty? | Was the reporting of the model adequate to inform your decision problem? | Was the interpretation of the results fair and balanced? | Were there any potential conflicts of interest? | If there were potential conflicts of interest, were steps taken to address these? |     |
| Paltiel et al [56] | No                          | No                                      | No                                 | No                                                      | No                                                                                             | No                                                                                               | Yes                                                                                     | Yes                                                            | No                                                                            | Yes                                                                                   | Yes                                                             | Yes                                                                      | Yes                                                      | Yes                                             | No                                                                                | N/A |
