# Supplementary material
Source: PubMed Central journal article supplement (PMC10414231)
Supplement: xmed_v2i2e27254_app4.pdf [file xmed_v2i2e27254_app4.pdf]

**Table S1: Quality Assessment of Cohort Study**

| Critical Appraisal Skills Program (CASP) Tool |                                                |                                                |                                                        |                                                       |                                                                |                                                                                   |                                                |                                            |                                                                                                                                                          |                                                                                                              |                             |                                                     |                                                                 |                                                       |
|-----------------------------------------------|------------------------------------------------|------------------------------------------------|--------------------------------------------------------|-------------------------------------------------------|----------------------------------------------------------------|-----------------------------------------------------------------------------------|------------------------------------------------|--------------------------------------------|----------------------------------------------------------------------------------------------------------------------------------------------------------|--------------------------------------------------------------------------------------------------------------|-----------------------------|-----------------------------------------------------|-----------------------------------------------------------------|-------------------------------------------------------|
| Are the results of the study valid?           |                                                |                                                |                                                        |                                                       |                                                                |                                                                                   |                                                |                                            | What are the results?                                                                                                                                    |                                                                                                              |                             |                                                     |                                                                 |                                                       |
| Study                                         | Did the study address a clearly focused issue? | Was the cohort recruited in an acceptable way? | Was the exposure accurately measured to minimise bias? | Was the outcome accurately measured to minimise bias? | Have the authors identified all important confounding factors? | Have they taken account of the confounding factors in the design and/or analysis? | Was the follow up of subjects complete enough? | Was the follow up of subjects long enough? | What are the results of this study <sup>a</sup> ?                                                                                                        | How precise are the results?                                                                                 | Do you believe the results? | Can the results be applied to the local population? | Do the results of this study fit with other available evidence? | What are the implications of this study for practice? |
| <b>Effectiveness</b>                          |                                                |                                                |                                                        |                                                       |                                                                |                                                                                   |                                                |                                            |                                                                                                                                                          |                                                                                                              |                             |                                                     |                                                                 |                                                       |
| Porru et al [57]                              | Yes                                            | Yes                                            | Yes                                                    | Yes <sup>b</sup>                                      | No <sup>c</sup>                                                | Yes                                                                               | Yes <sup>d</sup>                               | Yes                                        | A total of 238 workers had a positive test with a cumulative incidence of 4.0%. A third of positive cases were symptomatic while 2.3% were asymptomatic. | Cumulative incidence was 4.0% (95% CI: 3.5–4.5%). The risk odds ratio in medical wards was 2.7 (95% CI: 1.9– | Yes                         | No <sup>e</sup>                                     | Yes                                                             | Yes <sup>f</sup>                                      |

## Critical Appraisal Skills Program (CASP) Tool

| Are the results of the study valid? |                                                    |                                                |                                                        |                                                       |                                                                |                                                                                   |                                                |                                            | What are the results?                                                      |                                                   |                             |                                                     |                                                                 |                                                       |
|-------------------------------------|----------------------------------------------------|------------------------------------------------|--------------------------------------------------------|-------------------------------------------------------|----------------------------------------------------------------|-----------------------------------------------------------------------------------|------------------------------------------------|--------------------------------------------|----------------------------------------------------------------------------|---------------------------------------------------|-----------------------------|-----------------------------------------------------|-----------------------------------------------------------------|-------------------------------------------------------|
| Study                               | Did the study address clearly the focus and issue? | Was the cohort recruited in an acceptable way? | Was the exposure accurately measured to minimise bias? | Was the outcome accurately measured to minimise bias? | Have the authors identified all important confounding factors? | Have they taken account of the confounding factors in the design and/or analysis? | Was the follow-up of subjects complete enough? | Was the follow-up of subjects long enough? | What are the results of this study <sup>a</sup> ?                          | How precise are the results?                      | Do you believe the results? | Can the results be applied to the local population? | Do the results of this study fit with other available evidence? | What are the implications of this study for practice? |
|                                     |                                                    |                                                |                                                        |                                                       |                                                                |                                                                                   |                                                |                                            | Incidence among the exposed was 40.5% and 0.5% among the non-exposed group | 3.9) and 4.3 (95% CI: 2.4–7.6) in health services |                             |                                                     |                                                                 |                                                       |

<sup>a</sup> The absolute risk reduction was unreported

<sup>b</sup> Neither subjects nor outcome assessors were blinded.

<sup>c</sup> Ethnicity of healthcare workers might have been important.

<sup>d</sup> No report on whether there was any loss to follow-up or not.

<sup>e</sup> Limited applicability due to study population and contextual differences

<sup>f</sup> Study highlights the importance of the intervention in a healthcare setting which can apply to any context.
