# Supplementary material
Source: PubMed Central journal article supplement (PMC10414231)
Supplement: xmed_v2i2e27254_app5.pdf [file xmed_v2i2e27254_app5.pdf]

**Table S1: Quality Assessment of Cross-sectional Studies**

| Specialist Unit for Review Evidence (SURE) Profile Table |                                     |                                                    |                                                         |                                    |                                           |                                                       |                                                              |                                             |                                                     |                                 |                                                   |                                                                               |  |
|----------------------------------------------------------|-------------------------------------|----------------------------------------------------|---------------------------------------------------------|------------------------------------|-------------------------------------------|-------------------------------------------------------|--------------------------------------------------------------|---------------------------------------------|-----------------------------------------------------|---------------------------------|---------------------------------------------------|-------------------------------------------------------------------------------|--|
| Study                                                    | Is the study design clearly stated? | Does the study address a clearly focused question? | Are the setting, locations and relevant dates provided? | Were participants fairly selected? | Are participant characteristics provided? | Are the measures of exposures & outcomes appropriate? | Is there a description of how the study size was arrived at? | Are the statistical methods well described? | Is information provided on participant eligibility? | Are the results well described? | Is any sponsorship/conflict of interest reported? | Did the authors identify any limitations and, if so, are they captured above? |  |
| <b>Effectiveness</b>                                     |                                     |                                                    |                                                         |                                    |                                           |                                                       |                                                              |                                             |                                                     |                                 |                                                   |                                                                               |  |
| Hagan et al [55]                                         | No                                  | Yes                                                | No                                                      | Can't tell                         | Yes                                       | No                                                    | No                                                           | No                                          | No                                                  | Yes                             | Yes                                               | Yes                                                                           |  |
| <b>Asymptomatic proportion</b>                           |                                     |                                                    |                                                         |                                    |                                           |                                                       |                                                              |                                             |                                                     |                                 |                                                   |                                                                               |  |
| Nishiura et al [58]                                      | No                                  | Yes                                                | Yes                                                     | Yes                                | No                                        | No                                                    | N/A                                                          | No                                          | N/A                                                 | No                              | Yes                                               | No                                                                            |  |
| Treibel et al [59]                                       | No                                  | Yes                                                | Yes                                                     | Can't tell                         | No                                        | No                                                    | No                                                           | No                                          | No                                                  | Yes                             | Yes                                               | No                                                                            |  |
| Brown et al [61]                                         | Yes                                 | Yes                                                | Yes                                                     | Yes                                | Yes                                       | Yes                                                   | No                                                           | Yes                                         | Yes                                                 | Yes                             | Yes                                               | Yes                                                                           |  |

Specialist Unit for Review Evidence (SURE) Profile Table

| Study                   | Is the study design clearly stated? | Does the study address a clearly focused question? | Are the setting, locations and relevant dates provided? | Were participants fairly selected? | Are participant characteristics provided? | Are the measures of exposures & outcomes appropriate? | Is there a description of how the study size was arrived at? | Are the statistical methods well described? | Is information provided on participant eligibility? | Are the results well described? | Is any sponsorship/conflict of interest reported? | Did the authors identify any limitations and, if so, are they captured above? |
|-------------------------|-------------------------------------|----------------------------------------------------|---------------------------------------------------------|------------------------------------|-------------------------------------------|-------------------------------------------------------|--------------------------------------------------------------|---------------------------------------------|-----------------------------------------------------|---------------------------------|---------------------------------------------------|-------------------------------------------------------------------------------|
| Graham et al [62]       | Yes                                 | Yes                                                | Yes                                                     | Can't tell                         | Yes                                       | Yes                                                   | Yes                                                          | Yes                                         | No                                                  | Yes                             | Yes                                               | Yes                                                                           |
| Abey Suriya et al [60]  | Yes                                 | Yes                                                | Yes                                                     | Yes                                | Yes                                       | No                                                    | N/A                                                          | Yes                                         | N/A                                                 | Yes                             | Yes                                               | Yes                                                                           |
| Arons et al [63]        | Yes                                 | Yes                                                | Yes                                                     | Can't tell                         | Yes                                       | Yes                                                   | No                                                           | No                                          | No                                                  | Yes                             | No                                                | Yes                                                                           |
| Jameson et al [64]      | No                                  | Yes                                                | Yes                                                     | Yes                                | No                                        | No                                                    | N/A                                                          | No                                          | No                                                  | No                              | Yes                                               | No                                                                            |
| Callaghan et al [65]    | Yes                                 | Yes                                                | Yes                                                     | Can't tell                         | Yes                                       | Yes                                                   | No                                                           | No                                          | No                                                  | Yes                             | Yes                                               | Yes                                                                           |
| Louie et al [66]        | Yes                                 | Yes                                                | Yes                                                     | Can't tell                         | Yes                                       | Yes                                                   | No                                                           | No                                          | No                                                  | Yes                             | Yes                                               | Yes                                                                           |
| Gudbjartsson et al [67] | Yes                                 | Yes                                                | Yes                                                     | Can't tell                         | Yes                                       | Yes                                                   | No                                                           | Yes                                         | No                                                  | Yes                             | Yes                                               | No                                                                            |
| Reid et al [68]         | Yes                                 | Yes                                                | Yes                                                     | Yes                                | Yes                                       | No                                                    | N/A                                                          | Yes                                         | N/A                                                 | No                              | Yes                                               | No                                                                            |



Specialist Unit for Review Evidence (SURE) Profile Table

| Study              | Is the study design clearly stated? | Does the study address a clearly focused question? | Are the setting, locations and relevant dates provided? | Were participants fairly selected? | Are participant characteristics provided? | Are the measures of exposures & outcomes appropriate? | Is there a description of how the study size was arrived at? | Are the statistical methods well described? | Is information provided on participant eligibility? | Are the results well described? | Is any sponsorship/conflict of interest reported? | Did the authors identify any limitations and, if so, are they captured above? |
|--------------------|-------------------------------------|----------------------------------------------------|---------------------------------------------------------|------------------------------------|-------------------------------------------|-------------------------------------------------------|--------------------------------------------------------------|---------------------------------------------|-----------------------------------------------------|---------------------------------|---------------------------------------------------|-------------------------------------------------------------------------------|
| Baggett et al [77] | No                                  | Yes                                                | Yes                                                     | Can't tell                         | Yes                                       | Yes                                                   | No                                                           | No                                          | No                                                  | Yes                             | Yes                                               | Yes                                                                           |
| Imbert et al [78]  | No                                  | Yes                                                | Yes                                                     | Can't tell                         | Yes                                       | No                                                    | No                                                           | Yes                                         | No                                                  | No                              | Yes                                               | Yes                                                                           |
