# Supplementary material
Source: PubMed Central journal article supplement (PMC10414231)
Supplement: xmed_v2i2e27254_app6.pdf [file xmed_v2i2e27254_app6.pdf]

**Table S1: Certainty of Evidence for the Primary Objective**

| GRADE Evidence Profile: Mass Testing and Contact Tracing compared to Conventional Test and Trace |                             |                      |                      |                      |                  |                                                                                                                                                                                                        |                     |                     |
|--------------------------------------------------------------------------------------------------|-----------------------------|----------------------|----------------------|----------------------|------------------|--------------------------------------------------------------------------------------------------------------------------------------------------------------------------------------------------------|---------------------|---------------------|
| No of Studies (Design)                                                                           | Quality of Evidence Factors |                      |                      |                      |                  | Direction of Effect Summary of Findings                                                                                                                                                                |                     | Quality of evidence |
|                                                                                                  | Study bias                  | Heterogeneity        | Indirectness         | Imprecision          | Publication Bias | Conventional Test and Trace                                                                                                                                                                            | Mass Test and Trace |                     |
|                                                                                                  |                             |                      |                      |                      |                  | Control of SARS-CoV-2/COVID-19 Transmissions                                                                                                                                                           |                     |                     |
| <b>Effectiveness</b>                                                                             |                             |                      |                      |                      |                  |                                                                                                                                                                                                        |                     |                     |
|                                                                                                  |                             |                      |                      |                      |                  | <p><b>Emery et al [44]</b><br/>53% (95% Posterior Interval, PI: 51-56%) of asymptomatic carriers under symptom-based testing went undetected compared to mass testing.</p>                             | ↑                   |                     |
| n=11 (Modeling studies)                                                                          | Serious <sup>a</sup>        | Serious <sup>b</sup> | Serious <sup>c</sup> | Serious <sup>d</sup> | Unlikely         | <p><b>Grassly et al [45]</b><br/>Test and trace will reduce R<sup>e</sup> by 8% (95% Uncertainty Interval 5–11) for 50% coverage and 48-hour sample-quarantine delay, compared to mass PCR testing</p> | ↓                   | ●○○○                |
|                                                                                                  |                             |                      |                      |                      |                  | <p>Tsou et al [46]<br/>Symptom-based testing prevented no subclinical case while symptom-based plus at-risk group testing prevented 40%, 60%, and 80% of subclinical cases</p>                         | ↑                   |                     |
|                                                                                                  |                             |                      |                      |                      |                  | <p><b>Mizumoto et al [47]</b><br/>A total of 634 detected due to mass testing compared to 306 symptomatic</p>                                                                                          | ↑                   |                     |

**GRADE Evidence Profile: Mass Testing and Contact Tracing compared to Conventional Test and Trace**

| No of Studies (Design) | Quality of Evidence Factors |               |              |             |                  | Direction of Effect                          | Summary of Findings                                                                                                                                                                                                   | Quality of evidence |
|------------------------|-----------------------------|---------------|--------------|-------------|------------------|----------------------------------------------|-----------------------------------------------------------------------------------------------------------------------------------------------------------------------------------------------------------------------|---------------------|
|                        | Study bias                  | Heterogeneity | Indirectness | Imprecision | Publication Bias | Conventional Test and Trace                  | Mass Test and Trace                                                                                                                                                                                                   |                     |
|                        |                             |               |              |             |                  | Control of SARS-CoV-2/COVID-19 Transmissions | cases that would have been detected through the symptom-based approach                                                                                                                                                |                     |
|                        |                             |               |              |             |                  |                                              | <p><b>Sasmita et al [48]</b><br/>                     Contact tracing (test trace) combined with other measures showed to be more effective than mass testing combined with other measures in outbreak prediction</p> | ↓                   |
|                        |                             |               |              |             |                  |                                              | <p><b>Moghadas et al [49]</b><br/>                     Symptom-based test and trace must be combined with testing irrespective of symptomology</p>                                                                    | ↑                   |
|                        |                             |               |              |             |                  |                                              | <p><b>Bracis et al [50]</b><br/>                     Symptom test and trace was more effective than mass testing in reducing daily deaths and when aiming for 70% post-COVID-19 physical interactions</p>             | ↓                   |
|                        |                             |               |              |             |                  |                                              | <p><b>Pollmann et al [51]</b><br/>                     Mass random testing and contact tracing can control the outbreak as oppose to contact tracing (test and trace)</p>                                             | ↑                   |
|                        |                             |               |              |             |                  |                                              | <p><b>Hill et al [52]</b></p>                                                                                                                                                                                         | ↑                   |

**GRADE Evidence Profile: Mass Testing and Contact Tracing compared to Conventional Test and Trace**

| No of Studies (Design)    | Quality of Evidence Factors |               |                      |                      |                  | Direction of Effect                                                                                                                                             | Summary of Findings | Quality of evidence |
|---------------------------|-----------------------------|---------------|----------------------|----------------------|------------------|-----------------------------------------------------------------------------------------------------------------------------------------------------------------|---------------------|---------------------|
|                           | Study bias                  | Heterogeneity | Indirectness         | Imprecision          | Publication Bias | Conventional Test and Trace                                                                                                                                     | Mass Test and Trace |                     |
|                           |                             |               |                      |                      |                  | Control of SARS-CoV-2/COVID-19 Transmissions                                                                                                                    |                     |                     |
|                           |                             |               |                      |                      |                  | Regular mass testing and contact tracing reduced infections by more than 50% compared to when there is no mass testing                                          |                     |                     |
|                           |                             |               |                      |                      |                  | <b>Gorji et al [53]</b><br>Mass testing (about 166 per 100,000) based on contact counting is more effective, reducing reproduction number from R = 2.4 to R = 1 |                     | ↑                   |
|                           |                             |               |                      |                      |                  | <b>Alsing et al [54]</b><br>Mass testing and contact tracing can contain 74% of the outbreak and get R below 1 more than contact tracing                        |                     | ↑                   |
| <b>Effectiveness</b>      |                             |               |                      |                      |                  |                                                                                                                                                                 |                     |                     |
| n=1 (Cross-sectional)     | Serious <sup>f</sup>        | Unlikely      | Serious <sup>g</sup> | Serious <sup>h</sup> | Unlikely         | <b>Hagan et al [55]</b><br>Mass testing identified 8,239 (Range; 10-2193, Median=403) compared to 642 (Range: 2-181, Median=19) during symptom-based testing    |                     | ↑ ● ○ ○ ○ ○         |
| <b>Cost-effectiveness</b> |                             |               |                      |                      |                  |                                                                                                                                                                 |                     |                     |
| n=1                       | Serious <sup>i</sup>        | Unlikely      | Serious <sup>j</sup> | Serious <sup>k</sup> | Unlikely         | <b>Paltiel et al [56]</b>                                                                                                                                       |                     | ↑ ● ○ ○ ○ ○         |

**GRADE Evidence Profile: Mass Testing and Contact Tracing compared to Conventional Test and Trace**

| No of Studies (Design) | Quality of Evidence Factors |               |              |             |                  | Direction of Effect Summary of Findings                                                                                                                |                     | Quality of evidence |
|------------------------|-----------------------------|---------------|--------------|-------------|------------------|--------------------------------------------------------------------------------------------------------------------------------------------------------|---------------------|---------------------|
|                        | Study bias                  | Heterogeneity | Indirectness | Imprecision | Publication Bias | Conventional Test and Trace                                                                                                                            | Mass Test and Trace |                     |
| (Modeling study)       |                             |               |              |             |                  | Control of SARS-CoV-2/COVID-19 Transmissions                                                                                                           |                     |                     |
|                        |                             |               |              |             |                  | Mass testing/screening (every 1, 2, or 7 days) was found to be more effective for R=3.5, 2.5, or 1.5 respectively, compared to symptom-based screening |                     |                     |

Favorable ↑    unfavorable ↓    Null effect ↔

<sup>a</sup> Internal validation for most studies and treatment of parameter/structural uncertainties unclear for some studies.

<sup>b</sup> Differences in study populations and settings. Lack of confidence intervals and statistical significance

<sup>c</sup> Population and settings in 5 studies were not representative

<sup>d</sup> No precise effect estimates in reported prediction in 8 studies.

<sup>e</sup> R = Reproduction number

<sup>f</sup> Possible methodological issues around subjects' recruitment and outcome measurements

<sup>g</sup> Unrepresentative population and setting

<sup>h</sup> Unreported effect estimates.

<sup>i</sup> No use of real-world data set and lack of clear external and internal validation process

<sup>j</sup> Unsuitable population and setting

<sup>k</sup> No precision in effect estimates.
