# Supplementary material
Source: PubMed Central journal article supplement (PMC10414231)
Supplement: xmed_v2i2e27254_app7.pdf [file xmed_v2i2e27254_app7.pdf]

**Table S1: Details of Mass Testing**

| Study                          | Test Details                                                                                            | Cases | Asym <sup>a</sup> | Sample    | % in Cases | (95% CI)    | % in Sample | (95% CI)   |
|--------------------------------|---------------------------------------------------------------------------------------------------------|-------|-------------------|-----------|------------|-------------|-------------|------------|
|                                |                                                                                                         | 2661  | 1084              | 9,942,878 | 40.7       | (38.9–42.6) | 0.0         | (0.0–0.0)  |
| <b>Asymptomatic proportion</b> |                                                                                                         |       |                   |           |            |             |             |            |
| Porru et al [57]               | Real-time PCR (Seegene Allplex <sup>TM</sup> 2019-nCoV Assay) on oropharyngeal and nasopharyngeal swabs | 238   | 109               | 5942      | 45.8       | (39.3–52.4) | 1.8         | (1.5–2.2)  |
| Nishiura et al [58]            | Reverse transcription polymerase chain reaction                                                         | 13    | 4                 | 565       | 30.8       | (7.7–53.8)  | 0.7         | (0.2–1.8)  |
| Treibel et al (staffw1) [59]   |                                                                                                         | 28    | 28                | 396       | 100        | (87.6–100)  | 7.1         | (4.9–10.0) |
| Treibel et al (staffw2) [59]   |                                                                                                         | 14    | 14                | 284       | 100        | (76.8–100)  | 4.9         | (3.0–8.1)  |
| Treibel et al (staffw3) [59]   |                                                                                                         | 4     | 4                 | 263       | 100        | (39.8–100)  | 1.5         | (0.6–3.8)  |
| Treibel et al (staffw4) [59]   |                                                                                                         | 4     | 4                 | 267       | 100        | (39 –100)   | 1.5         | (0.6–3.8)  |
| Treibel et al (staffw5) [59]   |                                                                                                         | 3     | 3                 | 269       | 100        | (29.2–100)  | 1.1         | (0.4–3 .2) |
| Abey Suriya et al [60]         |                                                                                                         | 7     | 6                 | 180       | 85.7       | (42.1–99.6) | 3.3         | (1.2–7.1)  |

| Study                             | Test Details                                                                   | Cases | Asym <sup>a</sup> | Sample    | % in Cases | (95% CI)    | % in Sample | (95% CI)    |
|-----------------------------------|--------------------------------------------------------------------------------|-------|-------------------|-----------|------------|-------------|-------------|-------------|
|                                   |                                                                                | 2661  | 1084              | 9,942,878 | 40.7       | (38.9–42.6) | 0.0         | (0.0–0.0)   |
| Brown et al [61]                  | Applied Biosystems 7500 FAST system and ELITE InGenius (OSANG Healthcare)      | 23    | 4                 | 1152      | 17.4       | (5.0–38.8)  | 0.3         | (0.1–0.9)   |
| Graham et al (residts) [62]       | AusDiagnostics, Roche Cobas and Abbott                                         | 126   | 54                | 313       | 42.9       | (34–52)     | 17.3        | (13.2–21.9) |
| Graham et al (staff) [62]         | RealTime SARS- CoV-2 assays                                                    | 3     | 3                 | 70        | 100        | (29.2–100)  | 4.3         | (1–9)       |
| Arons et al [63]                  | SARS-CoV-2 CDC assay protocol                                                  | 48    | 27                | 76        | 56.3       | (41.2–70.5) | 35.5        | (24.9–47.3) |
| Jameson et al [64]                | GeneXpert RT-PCR assay (Cepheid, Sunnyvale, CA)                                | 0     | 0                 | 121       | -          | -           | 0.0         | (0.0–2.5)   |
| Callaghan et al [65]              | RT-PCR <sup>b</sup> Diagnostic Panel                                           | 0     | 0                 | 217       | -          | -           | 0.0         | (0.0–1.2)   |
| Louie et al (redts-staff) [66]    | Abbott m2000 RT-PCR                                                            | 86    | 86                | 303       | 100        | (95.8–100)  | 28.4        | (23.4–33.8) |
| Gudbjartsson et al (target1) [67] | TaqMan™ Fast Virus 1- step Master Mix, 2019-nCoV Assay kits v1 (Thermo Fisher) | 177   | 24                | 1924      | 13.6       | (8.9–19.5)  | 1.2         | (0.8–1.9)   |
| Gudbjartsson et al(pop) [67]      |                                                                                | 87    | 51                | 10,797    | 58.6       | (47.6–69.1) | 0.5         | (0.4–0.6)   |
| Gudbjartsson et al (target2) [67] |                                                                                | 1044  | 59                | 7275      | 5.7        | (4.3–7.2)   | 0.8         | (0.6–1.0)   |
| Gudbjartsson et al(random) [67]   |                                                                                | 13    | 7                 | 2283      | 53.8       | (25.1–80.8) | 0.3         | (0.1–0.6)   |
| Reid et al [68]                   |                                                                                | 5     | 5                 | 2751      | 100        | (47.8–100)  | 0.2         | (0.1–0.2)   |

| Study                            | Test Details                                                                            | Cases | Asym <sup>a</sup> | Sample    | % in Cases | (95% CI)    | % in Sample | (95% CI)   |
|----------------------------------|-----------------------------------------------------------------------------------------|-------|-------------------|-----------|------------|-------------|-------------|------------|
|                                  |                                                                                         | 2661  | 1084              | 9,942,878 | 40.7       | (38.9–42.6) | 0.0         | (0.0–0.0)  |
| Lavezzo et al (surv1) [69]       | TaqMan Fast Virus 1-Step Master Mix (Thermo Fisher)                                     | 73    | 29                | 2812      | 39.7       | (28.5–51.9) | 1.0         | (0.7–1.5)  |
| Lavezzo et al (surv2) [69]       |                                                                                         | 29    | 13                | 2343      | 44.8       | (26.5–64.3) | 0.6         | (0.3–0.9)  |
| Kimball et al [70]               | SARS-CoV-2 CDC assay protocol                                                           | 23    | 13                | 76        | 56.5       | (34.5–76.8) | 17.1        | (9.4–27.5) |
| Olalla et al [71]                | VIASURE SARS-CoV-2 from CerTest Biotec and LightMix Modular SARS-CoV (COVID19), Roche   | 2     | 1                 | 498       | 50.0       | (1.3–98.7)  | 0.2         | (0–1.1)    |
| Guery et al [72]                 | Detection kit for 2019 novel coronavirus RNA, PCR Fluorescence Probing, (Daan Gene Co.) | 3     | 2                 | 136       | 66.7       | (9.4–99.2)  | 1.5         | (0.2–5.2)  |
| Roxby et al (redts-staffd1) [73] |                                                                                         | 5     | 3                 | 142       | 60.0       | (14.7–94.7) | 2.1         | (0.4–6.0)  |
| Roxby et al (redts-staff2) [73]  |                                                                                         | 3     | 3                 | 80        | 100        | (29.2–100)  | 3.7         | (0.8–10.6) |
| Lytras et al (UK) [74]           |                                                                                         | 13    | 13                | 357       | 100        | (75.3–100)  | 3.6         | (2.0–6.1)  |
| Lytras et al (Spain) [74]        |                                                                                         | 25    | 25                | 394       | 100        | (86.3–100)  | 6.3         | (4.1–9.2)  |

| Study                      | Test Details                                                                                      | Cases | Asym <sup>a</sup> | Sample    | % in Cases | (95% CI)    | % in Sample | (95% CI)    |
|----------------------------|---------------------------------------------------------------------------------------------------|-------|-------------------|-----------|------------|-------------|-------------|-------------|
|                            |                                                                                                   | 2661  | 1084              | 9,942,878 | 40.7       | (38.9–42.6) | 0.0         | (0.0–0.0)   |
| Lytras et al (Turkey) [74] |                                                                                                   | 2     | 2                 | 32        | 100        | (15.8–100)  | 6.3         | (0.8–20.8)  |
| Hoehl et al [75]           | LightMix Modular SARS and Wuhan CoV E-gene, and LightMix Modular Wuhan CoV RdRP-gen (TIB MOLBIOL) | 2     | 2                 | 114       | 100        | (15.8–100)  | 1.8         | (0.2–6.2)   |
| Cao et al [76]             | Real-time fluorescence RT-PCR                                                                     | 300   | 300               | 9,899,828 | 100        | (98.8–100)  | 0.0         | 0           |
| Baggett et al [77]         |                                                                                                   | 147   | 129               | 408       | 87.8       | (81.3–92.6) | 31.6        | (27.1–36.4) |
| Imbert et al [78]          | Abbott m2000 RT-PCR                                                                               | 111   | 57                | 210       | 51.4       | (41.7–61)   | 27.1        | (21.3–33.1) |

<sup>a</sup> Asym = Asymptomatic

<sup>b</sup> RT-PCR = Reverse transcription-polymerase chain reaction
